# Supplementary material for: The in-built bionic “MoFe cofactor” in Fe-doped two-dimensional MoTe2 nanosheets for boosting the photocatalytic nitrogen reduction performance
Source: Royal Society of Chemistry journal article supplement (doi:10.1039/d0ta04251j), 2020-01-01
Supplement: d0ta04251j1.pdf [file d0ta04251j1.pdf]

## **In-built bionic “MoFe-cofactor” in Fe-doped two-dimensional MoTe<sub>2</sub> nanosheets for boosting the photocatalytic nitrogen reduction performance**

Hongda Li<sup>a,\*</sup>, Shaonan Gu<sup>c</sup>, Zijun Sun<sup>a</sup>, Fei Guo<sup>a</sup>, Yuanmiao Xie<sup>a</sup>, Boran Tao<sup>a</sup>, Xiong He<sup>a</sup>, Wenfeng Zhang<sup>b</sup>, Haixin Chang<sup>b,\*</sup>

<sup>a</sup> Center for Materials Science and Engineering, School of Mechanical and Transportation Engineering, Guangxi University of Science and Technology, Liuzhou, 545006, China

<sup>b</sup> Quantum-Nano Matter and Device Lab, State Key Laboratory of Material Processing and Die & Mould Technology, School of Materials Science and Engineering, Huazhong University of Science and Technology, Wuhan 430074, China

<sup>c</sup> Key Laboratory of Fine Chemicals in Universities of Shandong, School of Chemistry and Pharmaceutical Engineering, Qilu University of Technology (Shandong Academy of Sciences), Jinan, 250353, China

Email: hxchang@hust.edu.cn; hdli@gxust.edu.cn

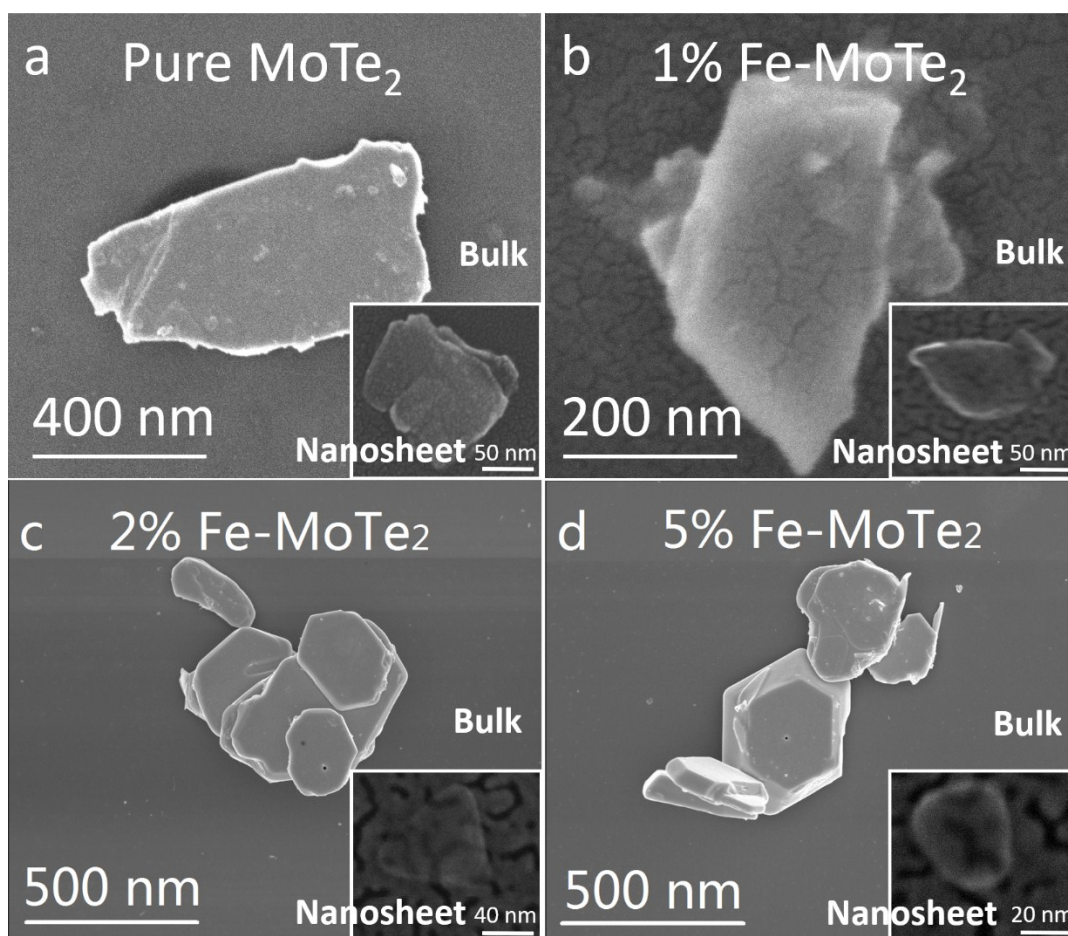

**Figure S1.** SEM images of the (a) pure MoTe<sub>2</sub>, (b) 1% Fe-MoTe<sub>2</sub>, (c) 2% Fe-MoTe<sub>2</sub> and (d) 5% Fe-MoTe<sub>2</sub>.

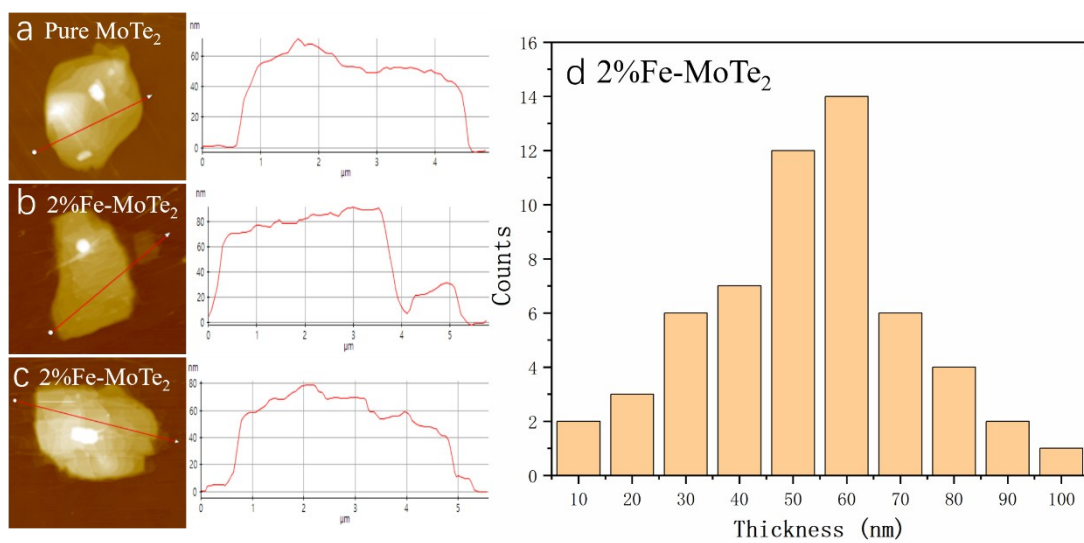

**Figure S2.** AFM images of (a) pure MoTe<sub>2</sub> and (b,c) 2% Fe-MoTe<sub>2</sub>; (c) Statistical diagram of the thickness for 2% Fe-MoTe<sub>2</sub>.

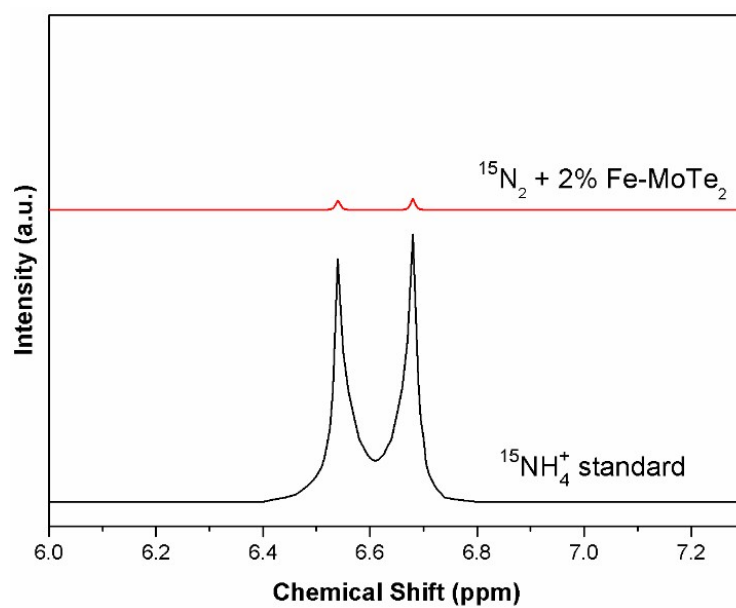

**Figure S3.**  $^1\text{H}$  NMR spectra of the filtered reaction solution under  $^{15}\text{N}_2$  atmosphere over 2% Fe-MoTe<sub>2</sub> and  $^{15}\text{NH}_4^+$  standard solution

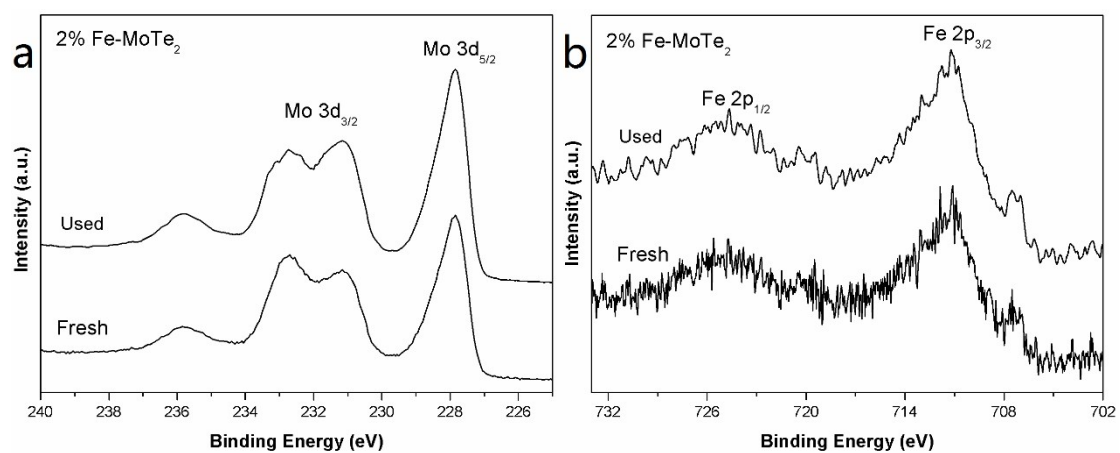

**Figure S4.** XPS spectra of (a) Mo 3d and (b) Fe 2p in 2% Fe-MoTe<sub>2</sub> before and after photocatalytic reaction

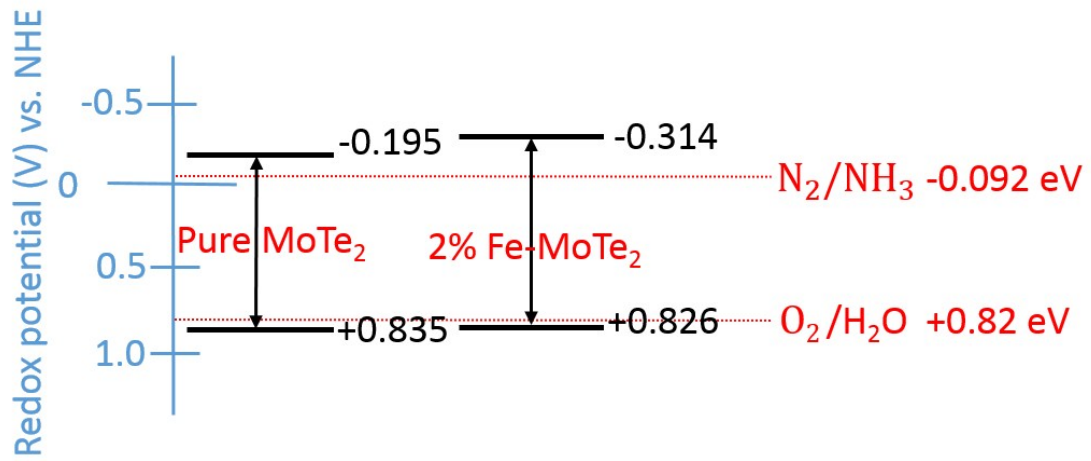

**Figure S5.** Schematic diagram of the redox potentials vs. NHE (pH=7) for the conduction band and valence band of the pure MoTe<sub>2</sub> and 2% Fe-MoTe<sub>2</sub> samples.

**Table S1.** Unit cell parameters of the pure MoTe<sub>2</sub>, 1% Fe-MoTe<sub>2</sub>, 2% Fe-MoTe<sub>2</sub> and 5% Fe-MoTe<sub>2</sub> samples

| Samples                 | Crystal Vol<br>(Å <sup>3</sup> ) | Lattice Parameters |        |         |
|-------------------------|----------------------------------|--------------------|--------|---------|
|                         |                                  | a (Å)              | b (Å)  | c (Å)   |
| pure MoTe <sub>2</sub>  | 149.84                           | 3.5198             | 3.5198 | 13.9658 |
| 1% Fe-MoTe <sub>2</sub> | 149.83                           | 3.5197             | 3.5197 | 13.9654 |
| 2% Fe-MoTe <sub>2</sub> | 149.74                           | 3.5188             | 3.5188 | 13.9650 |
| 5% Fe-MoTe <sub>2</sub> | 149.52                           | 3.5163             | 3.5163 | 13.9641 |

**Table S2.** Surface areas and real contents of Fe element in as-prepared MoTe<sub>2</sub> samples

| Samples                                         |         | pure MoTe <sub>2</sub> | 1% Fe-MoTe <sub>2</sub> | 2% Fe-MoTe <sub>2</sub> | 5% Fe-MoTe <sub>2</sub> |
|-------------------------------------------------|---------|------------------------|-------------------------|-------------------------|-------------------------|
| Element<br>s                                    | Te/mol% | 51.04                  | 50.58                   | 50.84                   | 51.97                   |
|                                                 | Mo/mol% | 48.96                  | 48.99                   | 48.34                   | 46.11                   |
|                                                 | Fe/mol% | —                      | 0.43                    | 0.82                    | 1.92                    |
| Surface areas/(m <sup>2</sup> g <sup>-1</sup> ) |         | 38.559                 | 36.735                  | 38.142                  | 33.821                  |
| Molar ratio of $\frac{Fe}{Mo}$ /%               |         | —                      | 0.88                    | 1.70                    | 4.16                    |



**Table S3.** Fluorescence lifetime parameters of samples from fitting curves of the Fluorescence decay measurements

| <b>Samples</b>                | <b>A<sub>1</sub></b><br><b>(%)</b> | <b>τ<sub>1</sub></b><br><b>(ns)</b> | <b>A<sub>2</sub></b><br><b>(%)</b> | <b>τ<sub>2</sub></b><br><b>(ns)</b> | <b>Weighted average τ</b><br><b>(ns)</b> |
|-------------------------------|------------------------------------|-------------------------------------|------------------------------------|-------------------------------------|------------------------------------------|
| <b>Pure MoTe<sub>2</sub></b>  | 89.44                              | 1.66                                | 10.56                              | 35.09                               | 5.19                                     |
| <b>1% Fe-MoTe<sub>2</sub></b> | 34.53                              | 15.37                               | 65.47                              | 81.99                               | 58.99                                    |
| <b>2% Fe-MoTe<sub>2</sub></b> | 14.88                              | 7.44                                | 85.12                              | 97.41                               | 84.02                                    |
| <b>5% Fe-MoTe<sub>2</sub></b> | 85.49                              | 1.57                                | 14.51                              | 64.27                               | 10.67                                    |

**Table S4.** Photocatalytic nitrogen fixation performance of different catalysts under various reaction conditions

| Catalysts                                            | Scavenger | Light Source                    | NH <sub>3</sub> generation rate<br>μmol g <sup>-1</sup> h <sup>-1</sup> | Reference        |
|------------------------------------------------------|-----------|---------------------------------|-------------------------------------------------------------------------|------------------|
| <b>Fe-doped MoTe<sub>2</sub></b>                     | None      | 300 W Xe lamp, λ>420 nm         | 129.08                                                                  | <b>This work</b> |
| <b>BiOBr with oxygen vacancies</b>                   | None      | 300 W Xe lamp, λ>420 nm         | 104.2                                                                   | S1               |
| <b>Cu-doped TiO<sub>2</sub></b>                      | None      | 300 W Xe lamp, λ=200–800 nm     | 78.9                                                                    | S2               |
| <b>Fe-Al/graphene</b>                                | None      | 500 W Xe lamp, λ>400 nm         | 25.3                                                                    | S3               |
| <b>Br-doped BiOCl with exposed {001} facets</b>      | None      | 300 W Xe lamp, λ>400 nm         | 126                                                                     | S4               |
| <b>g-C<sub>3</sub>N<sub>4</sub>-carbon vacancies</b> | None      | 300 W Xe lamp                   | 84                                                                      | S5               |
| <b>Defect-rich Bi<sub>3</sub>O<sub>4</sub>Br</b>     | None      | 300 W Xe lamp                   | 50.4                                                                    | S6               |
| <b>Fe@3D graphene</b>                                | None      | 500 W high-pressure Hg lamp     | 24                                                                      | S7               |
| <b>Co-GCN</b>                                        | Methanol  | 250 W high-pressure sodium lamp | 161.1                                                                   | S8               |

[S1] H. Li, J. Shang, Z. H. Ai, L. Z. Zhang, Efficient visible light nitrogen fixation with BiOBr nanosheets of oxygen vacancies on the exposed {001} facets, *J. Am. Chem. Soc.*, 2015, **137**, 6393-6399.

[S2] Y. Zhao, Y. Zhao, R. Shi, B. Wang, G. I. N. Waterhouse, L. Z. Wu, C. H. Tung, T. Zhang, Tuning Oxygen Vacancies in Ultrathin TiO<sub>2</sub> Nanosheets to Boost Photocatalytic Nitrogen Fixation up to 700 nm, *Adv. Mater.*, 2019, **31**, 1806482.

- [S3] Y. Yang, T. Zhang, Z. Ge, Y. Lu, H. Chang, P. Xiao, R. Zhao, Y. Ma, Y. Chen, Highly enhanced stability and efficiency for atmospheric ammonia photocatalysis by hot electrons from a graphene composite catalyst with Al<sub>2</sub>O<sub>3</sub>, *Carbon*, 2017, **124**, 72–78.
- [S4] D. Wu, R. Wang, C. Yang, Y. An, H. Lu, H. Wang, K. Cao, Z. Gao, W. Zhang, F. Xu, K. Jiang, Br doped porous bismuth oxychloride micro-sheets with rich oxygen vacancies and dominating {0 0 1} facets for enhanced nitrogen photo-fixation performances. *J. Colloid Interf. Sci.*, 2019, **556**, 111-119.
- [S5] Y. Zhang, J. Di, P. Ding, J. Zhao, K. Gu, X. Chen, Y. Cheng, S. Yin, J. Xia, H. Li, Ultrathin g-C<sub>3</sub>N<sub>4</sub> with enriched surface carbon vacancies enables highly efficient photocatalytic nitrogen fixation. *J. Colloid Interf. Sci.*, 2019, **553**, 530-539.
- [S6] J. Di, J.X. Xia, M.F. Chisholm, J. Zhong, C. Chen, X.Z. Cao, F. Dong, Z. Chi, H.L. Chen, Y.X. Weng, J. Xiong, S.Z. Yang, H.M. Li, Z. Liu, S. Dai, Defect-tailoring mediated electron-hole separation in single unit cell Bi<sub>3</sub>O<sub>4</sub>Br nanosheets for boosting photocatalytic hydrogen evolution and nitrogen fixation, *Adv. Mater.*, 2019, **31**, 1807576.
- [S7] Y.H. Lu, Y. Yang, T.F. Zhang, Z. Ge, H.C. Chang, P.S. Xiao, Y.Y. Xie, L. Hua, Q.Y. Li, H.Y. Li, B. Ma, N.J. Guan, Y.F. Ma, Y.S. Chen, Photoprompted hot electrons from bulk cross-linked graphene materials and their efficient catalysis for atmospheric ammonia synthesis, *ACS Nano*, 2016, **10**, 10507-10515.
- [S8] K.Y. Wang, G.Z. Gu, S.Z. Hu, J. Zhang, X.L. Sun, F. Wang, P. Li, Y.F. Zhao, Z.P. Fan, X. Zou, Molten salt assistant synthesis of three-dimensional cobalt doped graphitic carbon nitride for photocatalytic N<sub>2</sub> fixation: Experiment and DFT simulation analysis, *Chem. Eng. J.*, 2019, **368**, 896-904.
